# Supplementary material
Source: publisher figshare collection journal article supplement (https://gsapubs.figshare.com/articles/dataset/_/22220881)
Supplement: Supplementary file 1 [file 1]

## Sheet: Ages
Region	Deposit	Age	± σ	Method	Reference	No.
Orogenic Au deposits in Jiaodong of East China	Jiaojia	119.8	2.1	U-Pb dating of hydrothermal monazite	Deng et al., 2020	1
Orogenic Au deposits in Jiaodong of East China	Jiaojia	121.8	3.6	U-Pb dating of hydrothermal monazite	Deng et al., 2020	2
Orogenic Au deposits in Jiaodong of East China	Linglong	119.1	1.4	U-Pb dating of hydrothermal monazite	Deng et al., 2020	3
Orogenic Au deposits in Jiaodong of East China	Linglong	120	4.6	U-Pb dating of hydrothermal monazite	Deng et al., 2020	4
Orogenic Au deposits in Jiaodong of East China	Rushan	114.2	1.5	U-Pb dating of hydrothermal monazite	Deng et al., 2020	5
Orogenic Au deposits in Jiaodong of East China	Dazhuangzi	115.6	1	Ar-Ar dating of quartz	Deng et al., 2018	6
Orogenic Au deposits in Jiaodong of East China	Denggezhuang	118	9	Rb-Sr dating of sericite	Deng et al., 2018	7
Orogenic Au deposits in Jiaodong of East China	Fayunkuang	120.48	4.2	Rb-Sr dating of pyrite	Deng et al., 2018	8
Orogenic Au deposits in Jiaodong of East China	Hubajia	126.5	5.6	Rb-Sr dating of sericite	Deng et al., 2018	9
Orogenic Au deposits in Jiaodong of East China	Linglong	100.28	3.75	Rb-Sr dating of sericite	Deng et al., 2018	10
Orogenic Au deposits in Jiaodong of East China	Linglong	120.2	3.7	Rb-Sr dating of pyrite	Deng et al., 2018	11
Orogenic Au deposits in Jiaodong of East China	Linglong	123	4.2	Rb-Sr dating of pyrite	Deng et al., 2018	12
Orogenic Au deposits in Jiaodong of East China	Linglong	126.5	5.7	Rb-Sr dating of sericite	Deng et al., 2018	13
Orogenic Au deposits in Jiaodong of East China	Sanshandao	117.6	3	Rb-Sr dating of sericite	Deng et al., 2018	14
Orogenic Au deposits in Jiaodong of East China	Songjiagou	128.49	7.2	Rb-Sr dating of pyrite	Deng et al., 2018	15
Orogenic Au deposits in Jiaodong of East China	Cangshang	121.3	0.2	Ar-Ar dating of muscovite	Zhang et al., 2020	16
Orogenic Au deposits in Jiaodong of East China	Damoqujia	122.8	0.9	Ar-Ar dating of muscovite	Zhang et al., 2020	17
Orogenic Au deposits in Jiaodong of East China	Dayingezhuang	119.1	1.2	Ar-Ar dating of muscovite	Zhang et al., 2020	18
Orogenic Au deposits in Jiaodong of East China	Dayingezhuang	126.8	1.2	Ar-Ar dating of muscovite	Zhang et al., 2020	19
Orogenic Au deposits in Jiaodong of East China	Dayingezhuang	128.7	1	Ar-Ar dating of muscovite	Zhang et al., 2020	20
Orogenic Au deposits in Jiaodong of East China	Dayingezhuang	130.5	1	Ar-Ar dating of muscovite	Zhang et al., 2020	21
Orogenic Au deposits in Jiaodong of East China	Dayingezhuang	133.4	1.2	Ar-Ar dating of muscovite	Zhang et al., 2020	22
Orogenic Au deposits in Jiaodong of East China	Fushan	120	1	Ar-Ar dating of muscovite	Zhang et al., 2020	23
Orogenic Au deposits in Jiaodong of East China	Fushan	121	1	Ar-Ar dating of muscovite	Zhang et al., 2020	24
Orogenic Au deposits in Jiaodong of East China	Hushan	120	3.1	U-Pb dating of hydrothermal monazite	Zhang et al., 2020	25
Orogenic Au deposits in Jiaodong of East China	Jiaojia	119	1	Ar-Ar dating of muscovite	Zhang et al., 2020	26
Orogenic Au deposits in Jiaodong of East China	Jiaojia	120	1	Ar-Ar dating of muscovite	Zhang et al., 2020	27
Orogenic Au deposits in Jiaodong of East China	Jiaojia	120.1	0.2	Ar-Ar dating of muscovite	Zhang et al., 2020	28
Orogenic Au deposits in Jiaodong of East China	Jiaojia	120.2	0.2	Ar-Ar dating of muscovite	Zhang et al., 2020	29
Orogenic Au deposits in Jiaodong of East China	Jiaojia	120.5	0.6	Ar-Ar dating of muscovite	Zhang et al., 2020	30
Orogenic Au deposits in Jiaodong of East China	Jiehe	118.8	0.7	Ar-Ar dating of muscovite	Zhang et al., 2020	31
Orogenic Au deposits in Jiaodong of East China	Jiehe	118.9	0.8	Ar-Ar dating of muscovite	Zhang et al., 2020	32
Orogenic Au deposits in Jiaodong of East China	Jiehe	119.2	0.6	Ar-Ar dating of muscovite	Zhang et al., 2020	33
Orogenic Au deposits in Jiaodong of East China	Jiehe	119.4	0.7	Ar-Ar dating of muscovite	Zhang et al., 2020	34
Orogenic Au deposits in Jiaodong of East China	Jiehe	119.7	0.8	Ar-Ar dating of muscovite	Zhang et al., 2020	35
Orogenic Au deposits in Jiaodong of East China	Jiehe	120.7	0.8	Ar-Ar dating of muscovite	Zhang et al., 2020	36
Orogenic Au deposits in Jiaodong of East China	Jiehe	122.5	0.9	Ar-Ar dating of muscovite	Zhang et al., 2020	37
Orogenic Au deposits in Jiaodong of East China	Luoshan	120	1	Ar-Ar dating of muscovite	Zhang et al., 2020	38
Orogenic Au deposits in Jiaodong of East China	Luoshan	121	1	Ar-Ar dating of muscovite	Zhang et al., 2020	39
Orogenic Au deposits in Jiaodong of East China	Pengjiakuang	119.1	0.2	Ar-Ar dating of muscovite	Zhang et al., 2020	40
Orogenic Au deposits in Jiaodong of East China	Pengjiakuang	119.5	0.3	Ar-Ar dating of muscovite	Zhang et al., 2020	41
Orogenic Au deposits in Jiaodong of East China	Pengjiakuang	119.6	0.4	Ar-Ar dating of muscovite	Zhang et al., 2020	42
Orogenic Au deposits in Jiaodong of East China	Pengjiakuang	119.7	0.2	Ar-Ar dating of muscovite	Zhang et al., 2020	43
Orogenic Au deposits in Jiaodong of East China	Pengjiakuang	120.3	0.5	Ar-Ar dating of muscovite	Zhang et al., 2020	44
Orogenic Au deposits in Jiaodong of East China	Pengjiakuang	120.8	0.4	Ar-Ar dating of muscovite	Zhang et al., 2020	45
Orogenic Au deposits in Jiaodong of East China	Pengjiakuang	120.9	0.4	Ar-Ar dating of muscovite	Zhang et al., 2020	46
Orogenic Au deposits in Jiaodong of East China	Rushan	107.7	0.5	Ar-Ar dating of muscovite	Zhang et al., 2020	47
Orogenic Au deposits in Jiaodong of East China	Rushan	108	0.5	Ar-Ar dating of muscovite	Zhang et al., 2020	48
Orogenic Au deposits in Jiaodong of East China	Rushan	108.3	0.6	Ar-Ar dating of muscovite	Zhang et al., 2020	49
Orogenic Au deposits in Jiaodong of East China	Rushan	108.4	0.6	Ar-Ar dating of muscovite	Zhang et al., 2020	50
Orogenic Au deposits in Jiaodong of East China	Rushan	109.1	0.2	Ar-Ar dating of muscovite	Zhang et al., 2020	51
Orogenic Au deposits in Jiaodong of East China	Rushan	109.3	0.3	Ar-Ar dating of muscovite	Zhang et al., 2020	52
Orogenic Au deposits in Jiaodong of East China	Rushan	117	3	U-Pb dating of hydrothermal zircon	Zhang et al., 2020	53
Orogenic Au deposits in Jiaodong of East China	Rushan	118	2	Ar-Ar dating of muscovite	Zhang et al., 2020	54
Orogenic Au deposits in Jiaodong of East China	Rushan	121	2	Ar-Ar dating of muscovite	Zhang et al., 2020	55
Orogenic Au deposits in Jiaodong of East China	Sanjia	116.5	0.5	Ar-Ar dating of muscovite	Zhang et al., 2020	56
Orogenic Au deposits in Jiaodong of East China	Sizhuang	120	2	Ar-Ar dating of muscovite	Zhang et al., 2020	57
Orogenic Au deposits in Jiaodong of East China	Sizhuang	121	2	Ar-Ar dating of muscovite	Zhang et al., 2020	58
Orogenic Au deposits in Jiaodong of East China	Wanger'shan	119.2	1	Ar-Ar dating of muscovite	Zhang et al., 2020	59
Orogenic Au deposits in Jiaodong of East China	Wanger'shan	119.8	0.2	Ar-Ar dating of muscovite	Zhang et al., 2020	60
Orogenic Au deposits in Jiaodong of East China	Wanger'shan	119.9	0.4	Ar-Ar dating of muscovite	Zhang et al., 2020	61
Orogenic Au deposits in Jiaodong of East China	Wanger'shan	120.2	0.2	Ar-Ar dating of muscovite	Zhang et al., 2020	62
Orogenic Au deposits in Jiaodong of East China	Wanger'shan	120.2	0.2	Ar-Ar dating of muscovite	Zhang et al., 2020	63
Orogenic Au deposits in Jiaodong of East China	Wanger'shan	120.4	0.3	Ar-Ar dating of muscovite	Zhang et al., 2020	64
Orogenic Au deposits in Jiaodong of East China	Wanger'shan	120.6	0.7	Ar-Ar dating of muscovite	Zhang et al., 2020	65
Orogenic Au deposits in Jiaodong of East China	Wanger'shan	120.7	1.2	Ar-Ar dating of muscovite	Zhang et al., 2020	66
Orogenic Au deposits in Jiaodong of East China	Xiadian	119	1	Ar-Ar dating of muscovite	Zhang et al., 2020	67
Orogenic Au deposits in Jiaodong of East China	Xiadian	120	1.4	U-Pb dating of hydrothermal monazite	Zhang et al., 2020	68
Orogenic Au deposits in Jiaodong of East China	Xiadian	121	1	Ar-Ar dating of muscovite	Zhang et al., 2020	69
Orogenic Au deposits in Jiaodong of East China	Xincheng	119.8	0.8	Ar-Ar dating of muscovite	Zhang et al., 2020	70
Orogenic Au deposits in Jiaodong of East China	Xincheng	120.2	0.3	Ar-Ar dating of muscovite	Zhang et al., 2020	71
Orogenic Au deposits in Jiaodong of East China	Xincheng	120.7	0.2	Ar-Ar dating of muscovite	Zhang et al., 2020	72
Orogenic Au deposits in Jiaodong of East China	Xincheng	120.9	0.3	Ar-Ar dating of muscovite	Zhang et al., 2020	73
Orogenic Au deposits in Jiaodong of East China	Xipo	121.7	0.5	Ar-Ar dating of muscovite	Zhang et al., 2020	74
Orogenic Au deposits in Jiaodong of East China	Yinggezhuang	120	0.4	Ar-Ar dating of muscovite	Zhang et al., 2020	75
Porphyry and epithermal deposits in Southeast China	Luoboling porphyry Cu-Mo	104.6	1	Re-Os dating of molybdenite	Chen et al., 2019	76
Porphyry and epithermal deposits in Southeast China	Wuziqilong Cu	102.5	1.5	Ar-Ar dating of muscovite	Chen et al., 2019	77
Porphyry and epithermal deposits in Southeast China	Yueyang epithermal Ag-Cu-Au	91.47	0.39	Ar-Ar dating of adularia	Chen et al., 2019	78
Porphyry and epithermal deposits in Southeast China	Zijinshan high-sulfidation Au-Cu	103	1.5	Ar-Ar dating of alunite	Chen et al., 2019	79
Porphyry and epithermal deposits in Southeast China	Changkeng epithermal Au	109.9	1.4	Ar-Ar dating of muscovite	Mao et al., 2013	80
Porphyry and epithermal deposits in Southeast China	Changkeng epithermal Au	110.1	1.3	Ar-Ar dating of muscovite	Mao et al., 2013	81
Porphyry and epithermal deposits in Southeast China	Luoboling porphyry Cu-Mo	104.5	1.7	Ar-Ar dating of biotite	Pan et al., 2019	82
Porphyry and epithermal deposits in Southeast China	Luoboling porphyry Cu-Mo	102.5	1.5	Ar-Ar dating of sericite	Pan et al., 2019	83
Porphyry and epithermal deposits in Southeast China	Luoboling porphyry Cu-Mo	106.5	1.4	U-Pb dating of zircon	Pan et al., 2019	84
Porphyry and epithermal deposits in Southeast China	Luoboling porphyry Cu-Mo	103.8	0.9	U-Pb dating of zircon	Pan et al., 2019	85
Porphyry and epithermal deposits in Southeast China	Luoboling porphyry Cu-Mo	107	1.6	U-Pb dating of zircon	Pan et al., 2019	86
Porphyry and epithermal deposits in Southeast China	Luoboling porphyry Cu-Mo	105.4	1.6	U-Pb dating of zircon	Pan et al., 2019	87
Porphyry and epithermal deposits in Southeast China	Luoboling porphyry Cu-Mo	103.1	1.1	U-Pb dating of zircon	Pan et al., 2019	88
Porphyry and epithermal deposits in Southeast China	Luoboling porphyry Cu-Mo	105.4	0.5	U-Pb dating of zircon	Pan et al., 2019	89
Porphyry and epithermal deposits in Southeast China	Luoboling porphyry Cu-Mo	105	7.2	Rb-Sr dating of whole rock	Pan et al., 2019	90
Porphyry and epithermal deposits in Southeast China	Luoboling porphyry Cu-Mo	105	1	Rb-Sr dating of whole rock	Pan et al., 2019	91
Porphyry and epithermal deposits in Southeast China	Luoboling porphyry Cu-Mo	101.8	0.5	U-Pb dating of zircon	Pan et al., 2019	92
Porphyry and epithermal deposits in Southeast China	Luoboling porphyry Cu-Mo	101.6	0.7	U-Pb dating of zircon	Pan et al., 2019	93
Porphyry and epithermal deposits in Southeast China	Luoboling porphyry Cu-Mo	102.1	0.8	U-Pb dating of zircon	Pan et al., 2019	94
Porphyry and epithermal deposits in Southeast China	Luoboling porphyry Cu-Mo	105.5	2.2	Re-Os dating of molybdenite	Pan et al., 2019	95
Porphyry and epithermal deposits in Southeast China	Luoboling porphyry Cu-Mo	104.9	1.6	Re-Os dating of molybdenite	Pan et al., 2019	96
Porphyry and epithermal deposits in Southeast China	Zijinshan high-sulfidation Au-Cu	104.7	0.5	U-Pb dating of zircon	Pan et al., 2019	97
Porphyry and epithermal deposits in Southeast China	Zijinshan high-sulfidation Au-Cu	104.8	0.9	U-Pb dating of zircon	Pan et al., 2019	98
Porphyry and epithermal deposits in Southeast China	Zijinshan high-sulfidation Au-Cu	107.5	1.4	U-Pb dating of zircon	Pan et al., 2019	99
Porphyry and epithermal deposits in Southeast China	Zijinshan high-sulfidation Au-Cu	104.5	1.6	U-Pb dating of zircon	Pan et al., 2019	100
Porphyry and epithermal deposits in Southeast China	Zijinshan high-sulfidation Au-Cu	110	0.4	U-Pb dating of zircon	Pan et al., 2019	101
Porphyry and epithermal deposits in Southeast China	Zijinshan high-sulfidation Au-Cu	105	0.7	U-Pb dating of zircon	Pan et al., 2019	102
Porphyry and epithermal deposits in Southeast China	Zijinshan high-sulfidation Au-Cu	105	2.2	U-Pb dating of zircon	Pan et al., 2019	103
Porphyry and epithermal deposits in Southeast China	Zijinshan high-sulfidation Au-Cu	99.5	0.7	U-Pb dating of zircon	Pan et al., 2019	104
Porphyry and epithermal deposits in Southeast China	Zijinshan high-sulfidation Au-Cu	96	2	U-Pb dating of zircon	Pan et al., 2019	105
Porphyry and epithermal deposits in Southeast China	Zijinshan high-sulfidation Au-Cu	102.86	0.61	Ar-Ar dating of alunite	Pan et al., 2019	106
Porphyry and epithermal deposits in Southeast China	Zijinshan high-sulfidation Au-Cu	102.35	0.6	Ar-Ar dating of alunite	Pan et al., 2019	107
Porphyry and epithermal deposits in Southeast China	Zijinshan high-sulfidation Au-Cu	101.35	0.99	Ar-Ar dating of alunite	Pan et al., 2019	108
Porphyry and epithermal deposits in Southeast China	Zijinshan high-sulfidation Au-Cu	101.19	0.6	Ar-Ar dating of alunite	Pan et al., 2019	109
Porphyry and epithermal deposits in Southeast China	Zijinshan high-sulfidation Au-Cu	99.91	0.59	Ar-Ar dating of alunite	Pan et al., 2019	110
Porphyry and epithermal deposits in Southeast China	Zijinshan high-sulfidation Au-Cu	101.67	0.61	Ar-Ar dating of alunite	Pan et al., 2019	111
Porphyry and epithermal deposits in Southeast China	Zijinshan high-sulfidation Au-Cu	113.4	1.1	Ar-Ar dating of muscovite	Pan et al., 2019	112
Porphyry and epithermal deposits in Southeast China	Zijinshan high-sulfidation Au-Cu	112.9	1.2	U-Pb dating of zircon	Pan et al., 2019	113
Porphyry and epithermal deposits in Southeast China	Zijinshan high-sulfidation Au-Cu	103	4	Re-Os dating of pyrite	Pan et al., 2019	114
Porphyry and epithermal deposits in Southeast China	Zijinshan high-sulfidation Au-Cu	101.9	1.3	K-Ar dating of alunite	Pan et al., 2019	115
Porphyry and epithermal deposits in Southeast China	Zijinshan high-sulfidation Au-Cu	122	4	Rb-Sr daing of quartz	Pan et al., 2019	116
Porphyry and epithermal deposits in Southeast China	Zijinshan high-sulfidation Au-Cu	100	3	Rb-Sr daing of quartz	Pan et al., 2019	117
Porphyry and epithermal deposits in Southeast China	Zijinshan high-sulfidation Au-Cu	89		K-Ar dating of alunite	Pan et al., 2019	118
Porphyry and epithermal deposits in Southeast China	Zijinshan high-sulfidation Au-Cu	82		K-Ar dating of alunite	Pan et al., 2019	119
Porphyry and epithermal deposits in Southeast China	Zijinshan high-sulfidation Au-Cu	103.8		K-Ar dating of alunite	Pan et al., 2019	120
Porphyry and epithermal deposits in Southeast China	Zijinshan high-sulfidation Au-Cu	111.7		K-Ar dating of alunite	Pan et al., 2019	121
Porphyry and epithermal deposits in Southeast China	Zijinshan high-sulfidation Au-Cu	94.1		K-Ar dating of sericite	Pan et al., 2019	122
Porphyry and epithermal deposits in Southeast China	Xinan porphyry Cu-Mo	108		Re-Os dating of molybdenite	Xu et al., 2016	123
Porphyry and epithermal deposits in Southeast China	Zhilingtou Mo-Cu-Pb-Zn	108.3	8.3	Ar-Ar dating of sphalerite	Chu et al., 2020	124
Porphyry and epithermal deposits in Southeast China	Zhilingtou Mo-Cu-Pb-Zn	114.3	1.1	Re-Os dating of molybdenite	Chu et al., 2020	125
Porphyry and epithermal deposits in Southeast China	Huaixi Cu-Au	102	1	U-Pb dating of zircon	Li et al., 2010	126
Porphyry and epithermal deposits in Southeast China	Huaixi Cu-Au	101	2	Rb-Sr dating of quartz	Li et al., 2010	127
Porphyry and epithermal deposits in Southeast China	Shipingchuan Mo	102.5	1.2	U-Pb dating of zircon	Li et al., 2009	128
Porphyry and epithermal deposits in Southeast China	Tiantang Cu-Pb-Zn	104.5	0.7	U-Pb dating of zircon	Ni et al., 2020	129
Porphyry and epithermal deposits in Southeast China	Jinxi Cu-Mo	106.8	0.8	U-Pb dating of zircon	Pan et al., 2016	130
Porphyry and epithermal deposits in Southeast China	Jinxi Cu-Mo	104.5	1	U-Pb dating of zircon	Pan et al., 2016	131
Porphyry and epithermal deposits in Southeast China	Jinxi Cu-Mo	105.7	1.7	Re-Os dating of molybdenite	Pan et al., 2016	132
Porphyry and epithermal deposits in Southeast China	Hongshan porphyry Cu	97.8	0.7	K-Ar dating of quartz	Su et al., 2010	133
Porphyry and epithermal deposits in Southeast China	Hongshan porphyry Cu	99		U-Pb dating of zircon	Su et al., 2010	134
Porphyry and epithermal deposits in Southeast China	Hongshan porphyry Cu	100	1	U-Pb dating of zircon	Su et al., 2010	135
Porphyry and epithermal deposits in Southeast China	Yinkeng porphyry Mo	110.1	1.5	SHRIMP U-Pb dating of zircon	Wang et al., 2015	136
Porphyry and epithermal deposits in Southeast China	Chilu Mo	105		Re-Os dating of molybdenite	Yu et al., 2021	137
Porphyry and epithermal deposits in Southeast China	Maluntou Au	100	1	Rb-Sr dating of quartz	Yu et al., 2021	138
Porphyry and epithermal deposits in Southeast China	Pingdi Mo	107.4	3.3	Re-Os dating of molybdenite	Yu et al., 2021	139
Porphyry and epithermal deposits in Southeast China	Xiafu Mo	93	0.6	U-Pb dating of zircon	Yu et al., 2021	140
Porphyry and epithermal deposits in Southeast China	Xiafu Mo	92.2	1.3	Re-Os dating of molybdenite	Yu et al., 2021	141
Porphyry and epithermal deposits in Southeast China	Shilu Cu-Mo	104.1	1.3	Re-Os dating of molybdenite	Zhao et al., 2012	142
Porphyry and epithermal deposits in Southeast China	Shilu Cu-Mo	107	0.72	U-Pb dating of zircon	Zhao et al., 2012	143
Orogenic Au deposits in North America	Gold Crown of Alleghany	109.6	3	Rb-Sr dating of carbonate	Boehlke and Kistler, 1986	144
Orogenic Au deposits in North America	Kate Hardy of Alleghany	124.2	3	Rb-Sr dating of quartz	Boehlke and Kistler, 1986	145
Orogenic Au deposits in North America	Kate Hardy of Alleghany	124.5	3	Rb-Sr dating of carbonate	Boehlke and Kistler, 1986	146
Orogenic Au deposits in North America	Irelan of Alleghany	116.3	3	Rb-Sr dating of quartz	Boehlke and Kistler, 1986	147
Orogenic Au deposits in North America	Irelan of Alleghany	115	3	Rb-Sr dating of carbonate	Boehlke and Kistler, 1986	148
Orogenic Au deposits in North America	Irelan of Alleghany	112.9	3	K-Ar dating of mica	Boehlke and Kistler, 1986	149
Orogenic Au deposits in North America	Rainbow of Alleghany	111.6	3	K-Ar dating of mica	Boehlke and Kistler, 1986	150
Orogenic Au deposits in North America	Plumbago of Alleghany	112.5	3	K-Ar dating of mica	Boehlke and Kistler, 1986	151
Orogenic Au deposits in North America	Red Ledge of Washington	119.4	3	Rb-Sr dating of carbonate	Boehlke and Kistler, 1986	152
Orogenic Au deposits in North America	Red Ledge of Washington	121	3	K-Ar dating of mica	Boehlke and Kistler, 1986	153
Orogenic Au deposits in North America	Brunswick of Grass Valley	140.9	3	Rb-Sr dating of quartz	Boehlke and Kistler, 1986	154
Orogenic Au deposits in North America	Brunswick of Grass Valley	143.7	3	K-Ar dating of mica	Boehlke and Kistler, 1986	155
Orogenic Au deposits in North America	Gharabaldi of Mother Lode	114.6	3	Rb-Sr dating of carbonate	Boehlke and Kistler, 1986	156
Orogenic Au deposits in North America	Gharabaldi of Mother Lode	116.3	3	K-Ar dating of mica	Boehlke and Kistler, 1986	157
Orogenic Au deposits in North America	Mother Lode	108	3	K-Ar dating	Boehlke and Kistler, 1986	158
Orogenic Au deposits in North America	Mother Lode	116	3	K-Ar dating	Boehlke and Kistler, 1986	159
Orogenic Au deposits in North America	Mother Lode	127	3	K-Ar dating	Boehlke and Kistler, 1986	160
Orogenic Au deposits in North America	Mother Lode	123		K-Ar dating	Boehlke and Kistler, 1986	161
Fe, IOCG and porphyry Cu deposits in Andes	Mina Justa	110.9	0.7	Ar-Ar dating of actinolite	Chen et al., 2013	162
Fe, IOCG and porphyry Cu deposits in Andes	Mina Justa	109.9	1	Ar-Ar dating of actinolite	Chen et al., 2013	163
Fe, IOCG and porphyry Cu deposits in Andes	Mina Justa	103.7	0.6	Ar-Ar dating of microcline	Chen et al., 2013	164
Fe, IOCG and porphyry Cu deposits in Andes	Mina Justa	101.5	0.7	Ar-Ar dating of microcline	Chen et al., 2013	165
Fe, IOCG and porphyry Cu deposits in Andes	Mina Justa	99.1	0.9	Ar-Ar dating of microcline	Chen et al., 2013	166
Fe, IOCG and porphyry Cu deposits in Andes	Mina Justa	95	0.6	Ar-Ar dating of microcline	Chen et al., 2013	167
Fe, IOCG and porphyry Cu deposits in Andes	El Espino IOCG	108	3		Chen et al., 2013	168
Fe, IOCG and porphyry Cu deposits in Andes	El Soldado manto type Cu-Ag	108			Chen et al., 2013	169
Fe, IOCG and porphyry Cu deposits in Andes	Eliana	113	1		Chen et al., 2013	170
Fe, IOCG and porphyry Cu deposits in Andes	Monterrosas	115			Chen et al., 2013	171
Fe, IOCG and porphyry Cu deposits in Andes	Pampa del Pongo	109	4		Chen et al., 2013	172
Fe, IOCG and porphyry Cu deposits in Andes	Panulcillo IOCG	115		K-Ar dating of phlogopite	Chen et al., 2013	173
Fe, IOCG and porphyry Cu deposits in Andes	Raúl-Condestable IOCG	115.2	0.3	U-Pb dating of titanite	De Haller et al., 2006	174
Fe, IOCG and porphyry Cu deposits in Andes	Carmen de Fierro Fe	131	1	U-Pb dating of apatite	Tornos et al., 2021	175
Fe, IOCG and porphyry Cu deposits in Andes	Candelaria-Punta del Cobre IOCG	116.51	0.26	Ar-Ar dating of biotite	Marschik and Fontboté, 2001	176
Fe, IOCG and porphyry Cu deposits in Andes	Candelaria-Punta del Cobre IOCG	115.14	0.18	Ar-Ar dating of biotite	Marschik and Fontboté, 2001	177
Fe, IOCG and porphyry Cu deposits in Andes	Candelaria-Punta del Cobre IOCG	116.6	1.2	Ar-Ar dating of amphibole	Marschik and Fontboté, 2001	178
Fe, IOCG and porphyry Cu deposits in Andes	Candelaria IOCG	114.2	0.6	Re-Os dating of molybdenite	Mathur et al., 2002	179
Fe, IOCG and porphyry Cu deposits in Andes	Candelaria IOCG	115.2	0.6	Re-Os dating of molybdenite	Mathur et al., 2002	180
Fe, IOCG and porphyry Cu deposits in Andes	Manto Verde IOCG	117	3	K-Ar dating of sericite	Mathur et al., 2002	181
Fe, IOCG and porphyry Cu deposits in Andes	Manto Verde IOCG	121	3	K-Ar dating of sericite	Mathur et al., 2002	182
Fe, IOCG and porphyry Cu deposits in Andes	Boqueron Chanar Fe	128	4	K-Ar dating of biotite	Oyarzun et al., 2003	183
Fe, IOCG and porphyry Cu deposits in Andes	Cerro Iman Fe	102	3	K-Ar dating of greisen	Oyarzun et al., 2003	184
Fe, IOCG and porphyry Cu deposits in Andes	El Algarrobo Fe	99.6	5	K-Ar dating of monzodiorite	Oyarzun et al., 2003	185
Fe, IOCG and porphyry Cu deposits in Andes	El Algarrobo Fe	115.6	5.8	K-Ar dating of diorite	Oyarzun et al., 2003	186
Fe, IOCG and porphyry Cu deposits in Andes	El Algarrobo Fe	128	6.4	K-Ar dating of diorite	Oyarzun et al., 2003	187
Fe, IOCG and porphyry Cu deposits in Andes	El Romeral Fe	110	3	K-Ar dating of biotite	Oyarzun et al., 2003	188
Fe, IOCG and porphyry Cu deposits in Andes	Los Colorados Fe	110		K-Ar dating of post mineral dyke	Oyarzun et al., 2003	189
Fe, IOCG and porphyry Cu deposits in Andes	Los Colorados Fe	111		K-Ar dating of andesite	Oyarzun et al., 2003	190
Fe, IOCG and porphyry Cu deposits in Andes	Los Colorados Fe	108		K-Ar dating of diorite	Oyarzun et al., 2003	191
Fe, IOCG and porphyry Cu deposits in Andes	Casualidad IOCG	100		U-Pb dating of zircon	Richards et al., 2017	194
Fe, IOCG and porphyry Cu deposits in Andes	Cerro Negro Norte IOCG	116		U-Pb dating of titanite	Richards et al., 2017	195
Fe, IOCG and porphyry Cu deposits in Andes	Productora IOCG	128.9		Re-Os dating of molybdenite	Richards et al., 2017	207
Fe, IOCG and porphyry Cu deposits in Andes	Santo Domingo IOCG	124		U-Pb dating of zircon	Richards et al., 2017	210
Fe, IOCG and porphyry Cu deposits in Andes	Todos Los Santos IOCG	118		Ar-Ar dating of actinolite	Richards et al., 2017	211
Fe, IOCG and porphyry Cu deposits in Andes	Trapiche IOCG	121	1	Ar-Ar dating of actinolite	Richards et al., 2017	213
Fe, IOCG and porphyry Cu deposits in Andes	Tropezon IOCG	110		U-Pb dating of zircon	Richards et al., 2017	214
Fe, IOCG and porphyry Cu deposits in Andes	Lo Aguirre manto type Cu	110		U-Pb dating of zircon	Sillitoe and Perelló, 2005	215
Fe, IOCG and porphyry Cu deposits in Andes	Punta Colorada porphyry Cu-Au	109.7	0.8	U-Pb dating of zircon	Richards et al., 2017	208
Fe, IOCG and porphyry Cu deposits in Andes	Elisa porphyry Cu-Au	92		U-Pb dating of zircon	Richards et al., 2017	198
Fe, IOCG and porphyry Cu deposits in Andes	Inca de Oro porphyry Cu-Au-Ag	90		U-Pb dating of zircon	Richards et al., 2017	199
Fe, IOCG and porphyry Cu deposits in Andes	La Union porphyry Cu-Au	112		U-Pb dating of zircon	Richards et al., 2017	200
Fe, IOCG and porphyry Cu deposits in Andes	La Verde porphyry Cu-Au	88		U-Pb dating of zircon	Richards et al., 2017	201
Fe, IOCG and porphyry Cu deposits in Andes	Las Campanas porphyry Cu-Au	90		U-Pb dating of zircon	Richards et al., 2017	202
Fe, IOCG and porphyry Cu deposits in Andes	Llahuin porphyry Cu-Au	92		Ar-Ar dating of biotite	Richards et al., 2017	203
Fe, IOCG and porphyry Cu deposits in Andes	Los Loros porphyry Cu-Au	91		U-Pb dating of zircon	Richards et al., 2017	204
Fe, IOCG and porphyry Cu deposits in Andes	Los Toros porphyry Cu	98			Richards et al., 2017	205
Fe, IOCG and porphyry Cu deposits in Andes	Pajonales porphyry Cu-Au	117		U-Pb dating of zircon	Richards et al., 2017	206
Fe, IOCG and porphyry Cu deposits in Andes	Colliguay porphyry Cu-Au	129		K-Ar dating of whole-rock	Richards et al., 2017	196
Fe, IOCG and porphyry Cu deposits in Andes	Cortadera porphyry Cu-Au	87		U-Pb dating of zircon	Richards et al., 2017	197
Fe, IOCG and porphyry Cu deposits in Andes	Cachiyuyo porphyry Cu-Au	111		U-Pb dating of zircon	Richards et al., 2017	192
Fe, IOCG and porphyry Cu deposits in Andes	Andacollo porphyry Cu	112	10	K-Ar dating of sericite	Sillitoe and Perelló, 2005	216
Fe, IOCG and porphyry Cu deposits in Andes	Carmen de Andacollo porphyry Cu-Au	104		U-Pb dating of zircon	Richards et al., 2017	193
Fe, IOCG and porphyry Cu deposits in Andes	Punta Colorada porphyry Cu-Au	110		Ar-Ar dating of adularia	Richards et al., 2017	209
Fe, IOCG and porphyry Cu deposits in Andes	Totora porphyry Cu-Au	120		U-Pb dating of zircon	Richards et al., 2017	212
Fe, IOCG and porphyry Cu deposits in Andes	Dos Amigos porphyry Cu-Au	106.1	3.5	U-Pb dating of zircon	Maksaev et al., 2010	217
Fe, IOCG and porphyry Cu deposits in Andes	Dos Amigos porphyry Cu-Au	104	3.5	U-Pb dating of zircon	Maksaev et al., 2010	218
Fe, IOCG and porphyry Cu deposits in Andes	Dos Amigos porphyry Cu-Au	94.8	0.9	Ar-Ar dating of biotite	Maksaev et al., 2010	219
Fe, IOCG and porphyry Cu deposits in Andes	Dos Amigos porphyry Cu-Au	96.1	1	Ar-Ar dating of sericite	Maksaev et al., 2010	220
Fe, IOCG and porphyry Cu deposits in Andes	Dos Amigos porphyry Cu-Au	85.8	1.2	Ar-Ar dating of sericite	Maksaev et al., 2010	221
Fe, IOCG and porphyry Cu deposits in Andes	Dos Amigos porphyry Cu-Au	96.3	3.7	Ar-Ar dating of muscovite	Maksaev et al., 2010	222
References:
Boehlke, J. K., and Kistler, R. W., 1986, Rb-Sr, KAr, and stable isotope evidence for the ages and sources of fluid components of gold-bearing quartz veins in the northern Sierra Nevada foothills metamorphic belt, California: Economic Geology, v. 81, p. 296-322.
Chen, H. Y., Cooke, D. R., and Baker, M. J., 2013, Mesozoic iron oxide copper-gold mineralization in the central Andes and the Gondwana supercontinent breakup: Economic Geology, v. 108, p. 37-44.
Chen, J., Cooke, D. R., Piquer, J., Selley, D., Zhang, L. J., and White, N. C., 2019, Hydrothermal alteration, mineralization, and structural geology of the Zijinshan high-sulfidation Au-Cu deposit, Fujian Province, Southeast China: Economic Geology, v. 114, p. 639-666.
Chu, K., Chen, X., Qi, G., Gao, X., Hu, B., and Li, S., 2020, Sulfer and lead isotope tracing for sources of ore-forming material and ore-forming age of the Zhilingtou Mo-Pb-Zn-Au polymetallic deposit in the Zhejiang Province: Acta Geologica Sinica, v. 94, p. 2325-2340.
De Haller, A., Corfu, F., Fontboté, L. s., Schaltegger, U., Barra, F., Chiaradia, M., Frank, M., and Alvarado, J. Z. n. i., 2006, Geology, geochronology, and Hf and Pb isotope data of the Raúl-Condestable iron oxide-copper-gold deposit, Central Coast of Peru: Economic Geology, v. 101, p. 281-310.
Deng, J., Qiu, K. F., Wang, Q. F., Goldfarb, R., Yang, L. Q., Zi, J. W., Geng, J. Z., and Ma, Y., 2020, In situ dating of hydrothermal monazite and implications for the geodynamic controls on ore formation in the Jiaodong gold province, Eastern China: Economic Geology, v. 115, p. 671-685.
Deng, J., Wang, C. M., Bagas, L., Santosh, M., and Yao, E. Y., 2018, Crustal architecture and metallogenesis in the south-eastern North China Craton: Earth-Science Reviews, v. 182, p. 251-272.
Li, Y., Wei, J., Yao, C., Yan, Y., Tan, J., Peng, L., Xiao, G., and Ye, Z., 2010, Genetic relationship of the Huaxi copper-gold deposit and the Caomen Alkaline granite, southeastern Zhejiang Province, China: Constraint from geochronologies: Earth Science, v. 35, p. 585-596.
Li, Y., Wei, J., Yao, C. L., Yan, Y., Tan, J., Fu, L. B., Pan, J., and Li, W., 2009, Zircon U-Pb dating and tectonic significance of the Shipingchuan granite in Southeastern Zhejiang Province, SE China: Geological Review, v. 55, p. 673-684.
Maksaev, V., Almonacid, T., Munizaga, F., Valencia, V., Mcwilliams, M., and Barra, F., 2010, Geochronological and thermochronological constraints on porphyry copper mineralization in the Domeyko alteration zone, northern Chile: Andean geology, v. 37, p. 144-176.
Mao, J. W., Cheng, Y. B., Chen, M. H., and Pirajno, F., 2013, Major types and time-space distribution of Mesozoic ore deposits in South China and their geodynamic settings: Mineralium Deposita, v. 48, p. 267-294.
Marschik, R., and Fontboté, L. s., 2001, The Candelaria-Punta del Cobre iron oxide Cu-Au(-Zn-Ag) deposits, Chile: Economic Geology, v. 96, p. 1799-1826.
Mathur, R., Marschik, R., Ruiz, J., Munizaga, F., Leveille, R. A., and Martin, W., 2002, Age of mineralization of the candelaria Fe oxide Cu-Au deposit and the origin of the Chilean iron belt, based on Re-Os isotopes: Economic Geology, v. 97, p. 59-71.
Ni, P., Pan, J. Y., and Chi, Z., 2020, Large-scale Yanshanian copper mineralization in South China: Metallogenic models and exploration implications: Mineral Deposits, v. 39, p. 754-784.
Oyarzun, R., Oyarzun, J., Menard, J. J., and Lillo, J., 2003, The Cretaceous iron belt of northern Chile: role of oceanic plates, a superplume event, and a major shear zone: Mineralium Deposita, v. 38, p. 640-646.
Pan, J. Y., Ni, P., Chi, Z., Wang, W. B., Zeng, W. C., and Xue, K., 2019, Alunite 40Ar/39Ar and zircon U-Pb constraints on the magmatic-hydrothermal history of the Zijinshan high-sulfidation epithermal Cu-Au deposit and the adjacent Luoboling porphyry Cu-Mo deposit, South China: Implications for their genetic association: Economic Geology, v. 114, p. 667-695.
Pan, T., Zhang, D., Ni, J., Chen, Q., Yuan, Y., and Di, Y., 2016, Zircon U-Pb and molybdenite Re-Os dating for the Jinxi copper (molybdenum) deposit in Pinghe County, Fujian Province, and its geological significance: Geochimica, v. 45, p. 173-189.
Richards, J. P., Lopez, G. P., Zhu, J. J., Creaser, R. A., Locock, A. J., and Mumin, A. H., 2017, Contrasting tectonic settings and sulfur contents of magmas associated with Cretaceous porphyry Cu ± Mo ± Au and intrusion-related iron oxide Cu-Au deposits in Northern Chile: Economic Geology, v. 112, p. 295-318.
Sillitoe, R. H., and Perelló, J., 2005, Andean copper province: Tectonomagmatic settings, deposit types, metallogeny, exploration, and discovery: Economic Geology 100th Anniversary Volume, v. 100, p. 845-890.
Su, H., Xie, G., Sun, J., Zhang, C., and Chen, Y., 2010, Zircon U-Pb dating for the granite porphyries in Hongshan porphyry copper deposit and Tongkenzhang porphyry molybdenum deposits in East Jiangxi Province and their significance: Acta Petrologica Sinica, v. 26, p. 819-829.
Tornos, F., Hanchar, J. M., Munizaga, R., Velasco, F., and Galindo, C., 2021, The role of the subducting slab and melt crystallization in the formation of magnetite-(apatite) systems, Coastal Cordillera of Chile: Mineralium Deposita, v. 56, p. 253-278.
Wang, K., Zhang, D., Wang, C., Yin, X., Zhu, Y., and Fu, F., 2015, Petrogenesis and metallogeny of Yinkeng porphyry Mo deposit in Jinhua, Zhejiang: The evidence from the petrology , petrogeochemistry, isotopes and SHRIMP zircon U-Pb dating: Earth Science Frontiers, v. 22, p. 357-367.
Xu, C., Chen, H. Y., Qi, J. P., Duan, G., Zhang, L., Wu, C., Zhang, S., and Zhong, W., 2016, Mesozoic multiphase magmatism at the Xinan Cu–Mo ore deposit (Zijinshan Orefield): Geodynamic setting and metallogenic implications: Ore Geology Reviews, v. 88, p. 768–790.
Yu, M., Hong, W., Yang, Z. L., Duan, Z., Chu, P. L., Chen, R., Fan, F. P., and CHen, S. Z., 2021, Classification of Yanshanian volcanic cycle and the related mineralization in the coast area of southeastern China: Geological Bulletin of China.
Zhang, L., Weinberg, R. F., Yang, L. Q., Groves, D. I., Sai, S. X., Matchan, E., Phillips, D., Kohn, B. P., Miggins, D. P., Liu, Y., and Deng, J., 2020, Mesozoic orogenic gold mineralization in the Jiaodong peninsula, China: A Focused Event at 120 ± 2 Ma during cooling of pregold granite intrusions: Economic Geology, v. 115, p. 415–441.
Zhao, H. J., Zheng, W., Yu, Z. F., Hu, Y. G., and Tian, Y., 2012, Re-Os dating of molybdenite from the Shilu Cu(Mo) deposit in western Guangdong Province and its geological implications: Geology in China, v. 39, p. 1604-1613.
